# Supplementary material for: Self-organization of metallo-supramolecular polymer networks by free formation of pyridine–phenanthroline heteroleptic complexes
Source: Royal Society of Chemistry journal article supplement (doi:10.1039/d3sm01136d), 2023-01-01
Supplement: d3sm01136d1.pdf [file d3sm01136d1.pdf]

– Supporting Information –

# Self-Organization of Metallo-Supramolecular Polymer Networks by Free Formation of Pyridine–Phenanthroline Heteroleptic Complexes

Mostafa Ahmadi, Cora Sprenger, Gerard Pareras, Albert Poater, Sebastian Seiffert

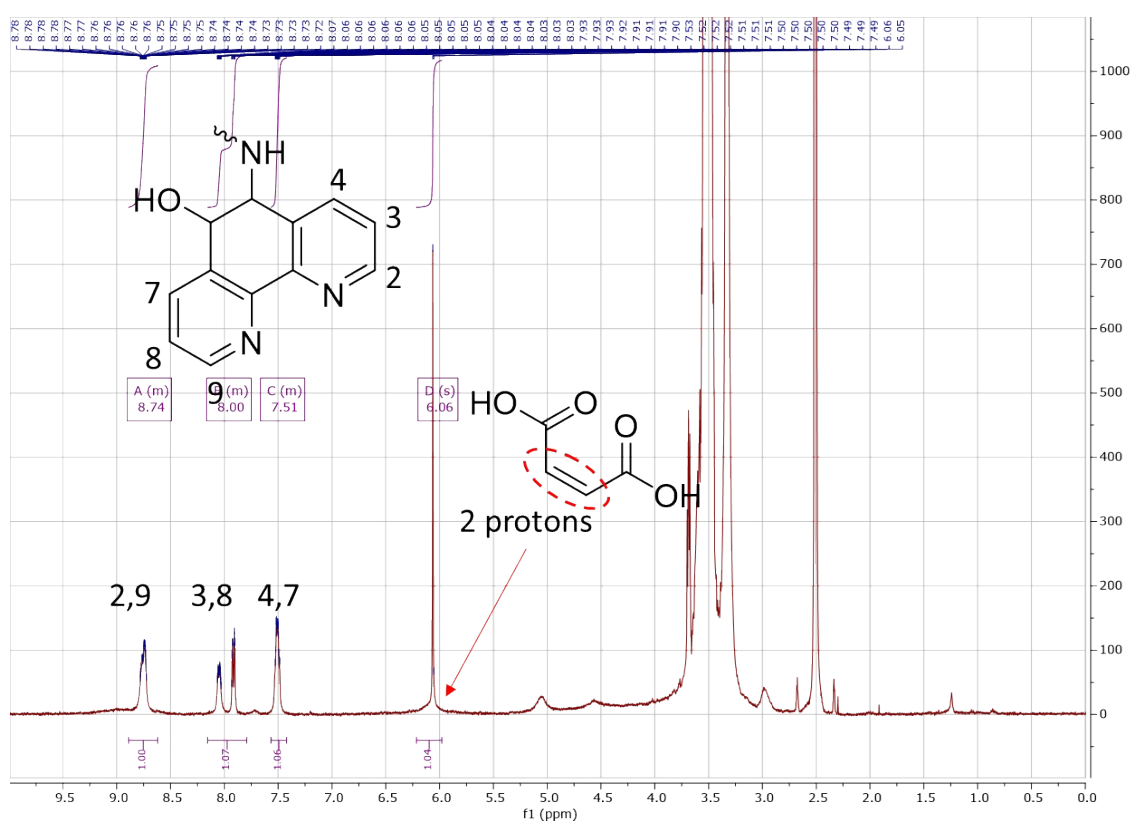

Figure S1. <sup>1</sup>H NMR spectra (400 MHz, DMSO-*d*<sub>6</sub>) of tetraEPhen20k along with the stoichiometric amount of maleic acid as the external standard.

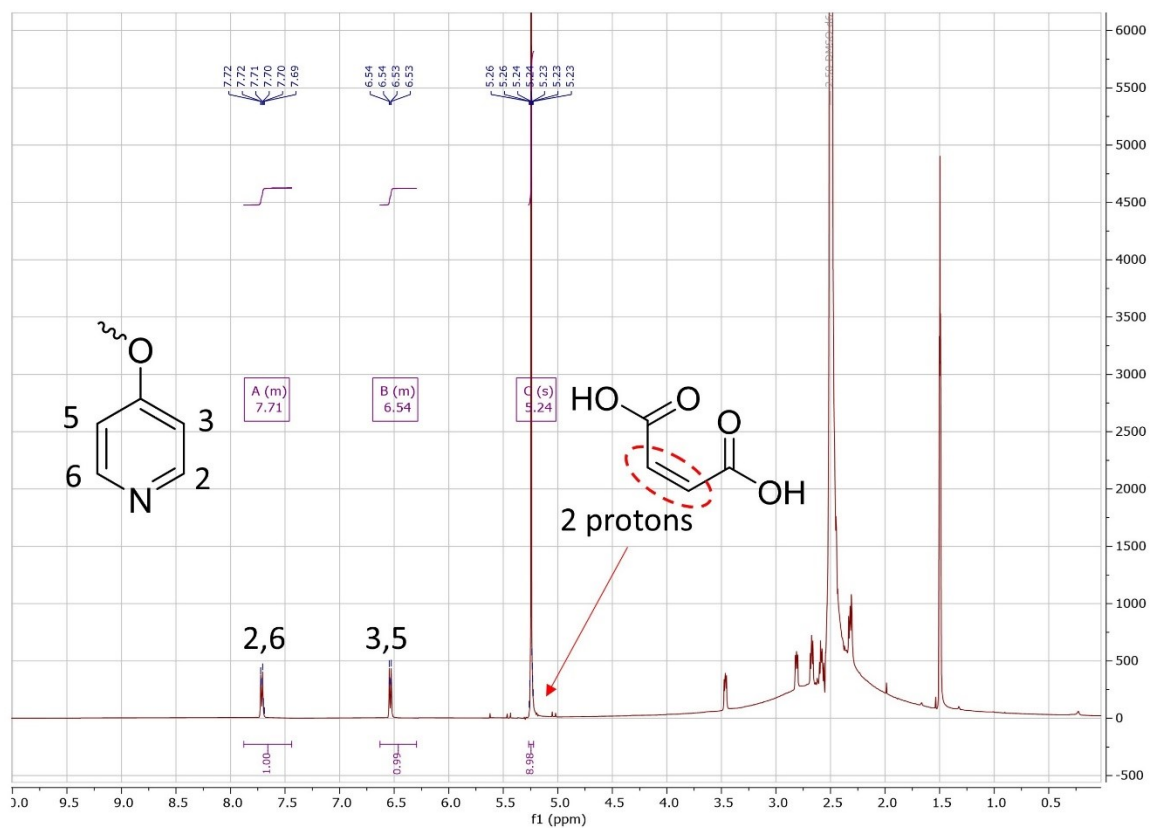

Figure S2.  $^1\text{H}$  NMR spectra (400 MHz,  $\text{DMSO-}d_6$ ) of tetraPy20k along with maleic acid as the external standard added 9 times of the equilibrium.

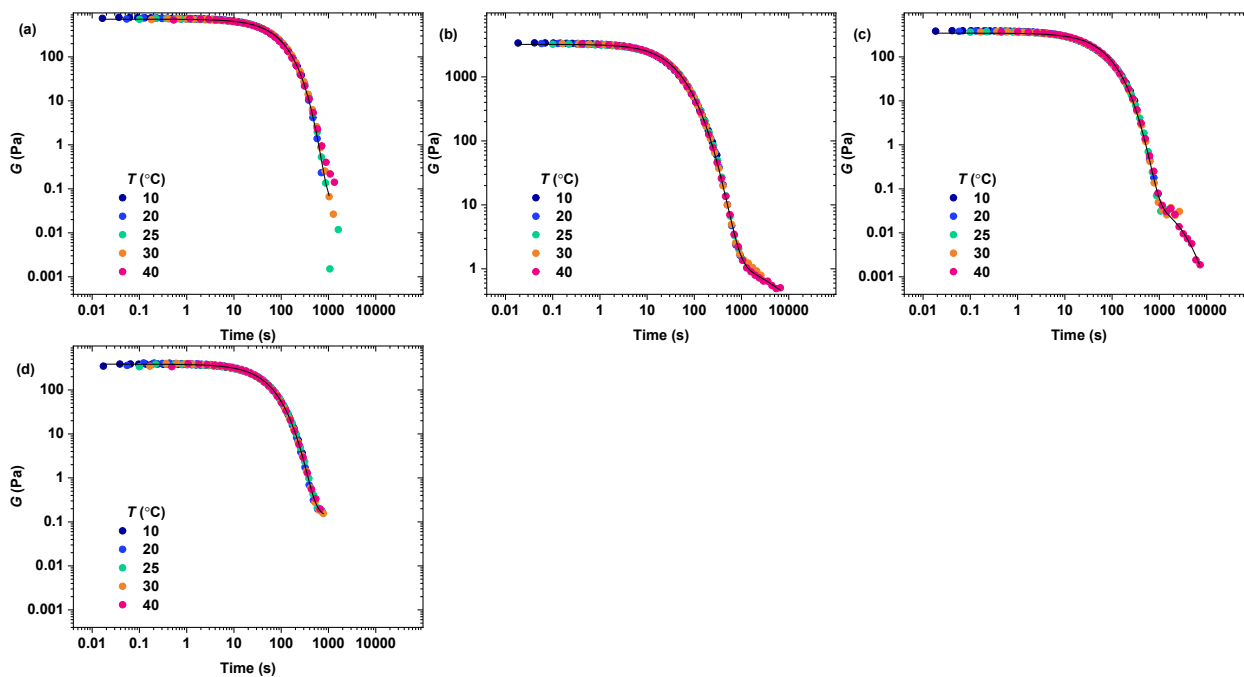

Figure S3. Shear stress master-curves of tetraPy(40)Py(X) samples series (symbols) and the corresponding fit of the generalized Maxwell modes (curves) for (a)  $X = 1$ , (b)  $X = 2$ , (c)  $X = 4$ , and (d)  $X = 6$ .

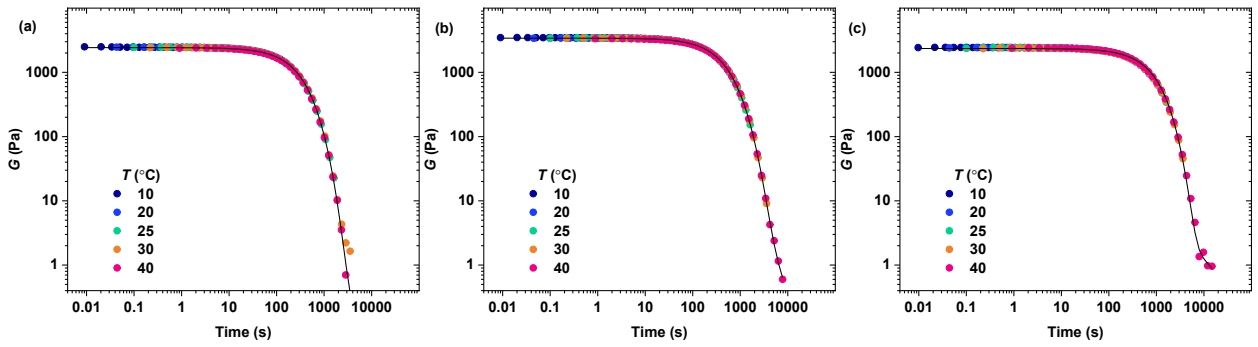

Figure S4. Shear stress master-curves of tetraEPhen(40)Fe(X) samples series (symbols) and the corresponding fit of the generalized Maxwell modes (curves) for (a) X = 2, (b) X = 4, and (c) X = 6.

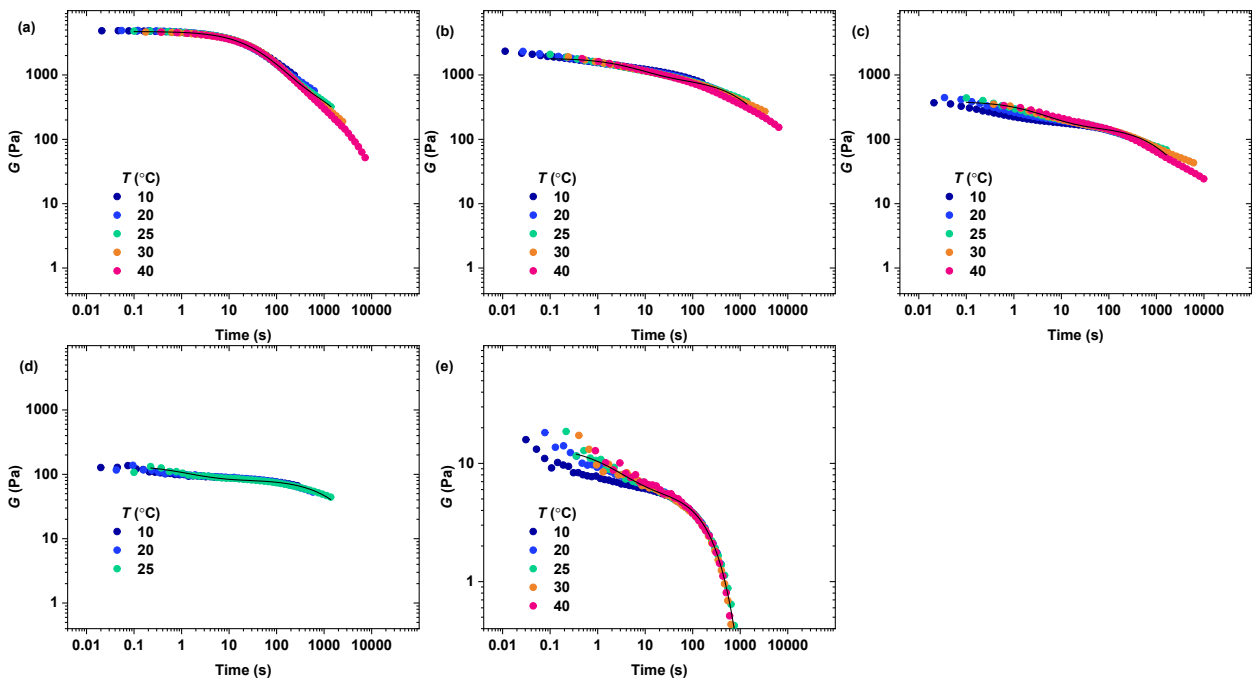

Figure S5. Shear stress master-curves of tetraEPhen(40)Pd(X) samples series (symbols) and the corresponding fit of the generalized Maxwell modes (curves) for (a) X = 2, (b) X = 3, (c) X = 4, (d) X = 5, and (e) X = 6.

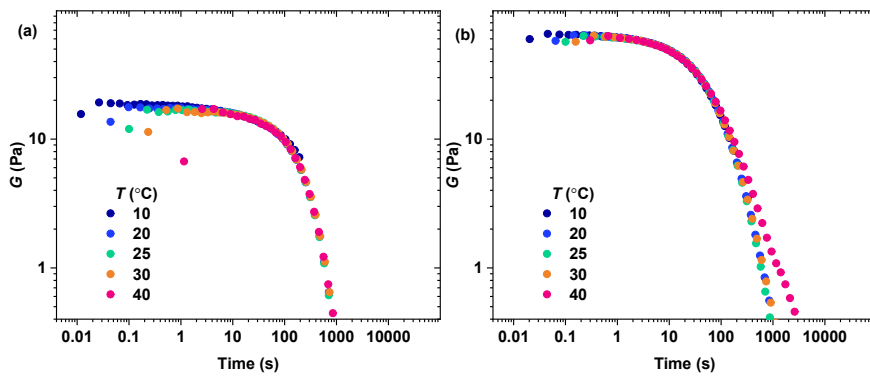

Figure S6. Shear stress master-curves of (a) tetraEPhen(20)Fe(2) and (b) tetraEPhen(20)Pd(2).

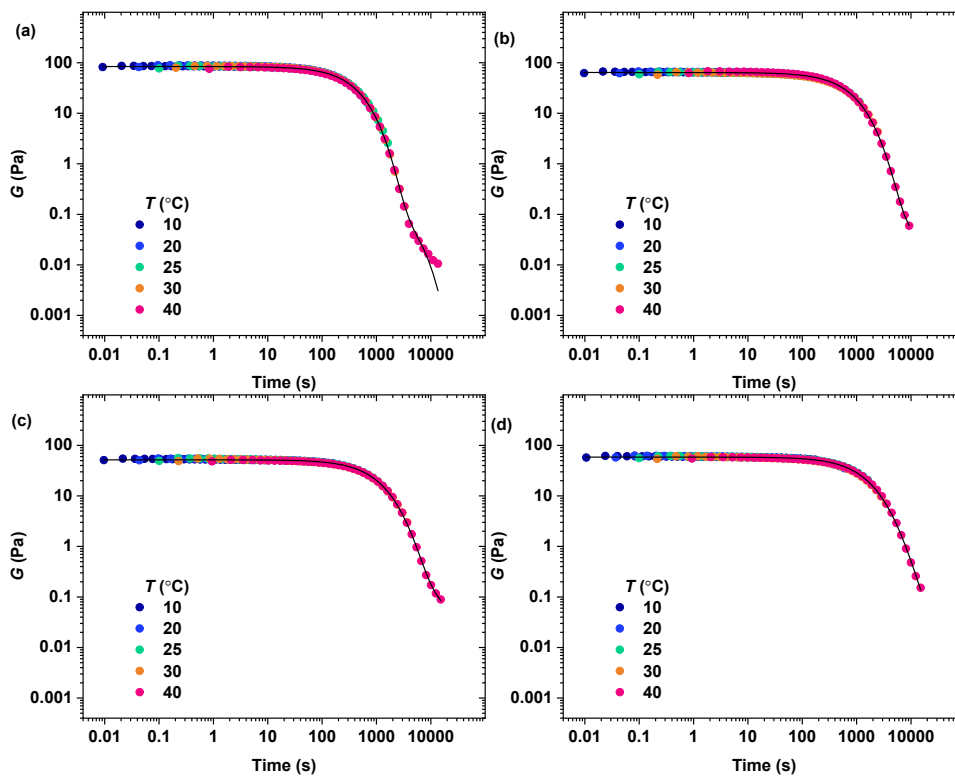

Figure S7. Shear modulus of mixed tetraPy/tetraEPhen networks (symbols) and the corresponding fit of the generalized Maxwell modes (curves) at EPhen:Fe<sup>2+</sup> = 1, 25 °C, and varying Py:EPhen ratios of (a) 1:1, (b) 2:1, (c) 3:1, and (d) 4:1.

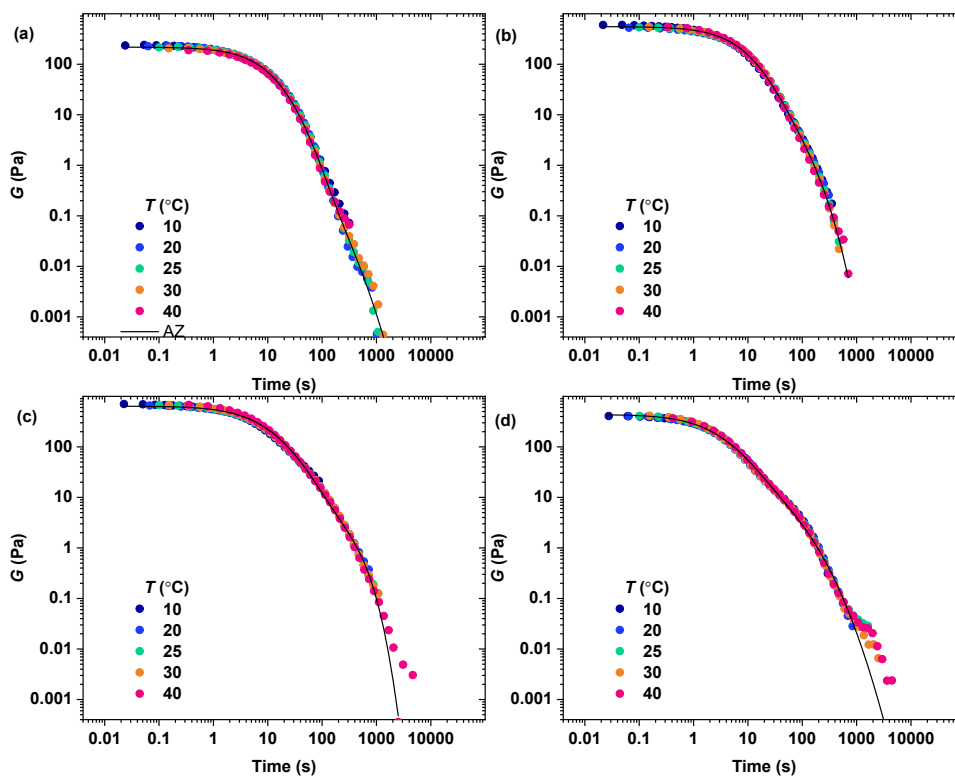

Figure S8. Shear modulus of mixed tetraPy/tetraEPhen networks (symbols) and the corresponding fit of the generalized Maxwell modes (curves) at EPhen:Pd<sup>2+</sup> = 1, 25 °C, and varying Py:EPhen ratios of (a) 1:1, (b) 2:1, (c) 3:1, and (d) 4:1.

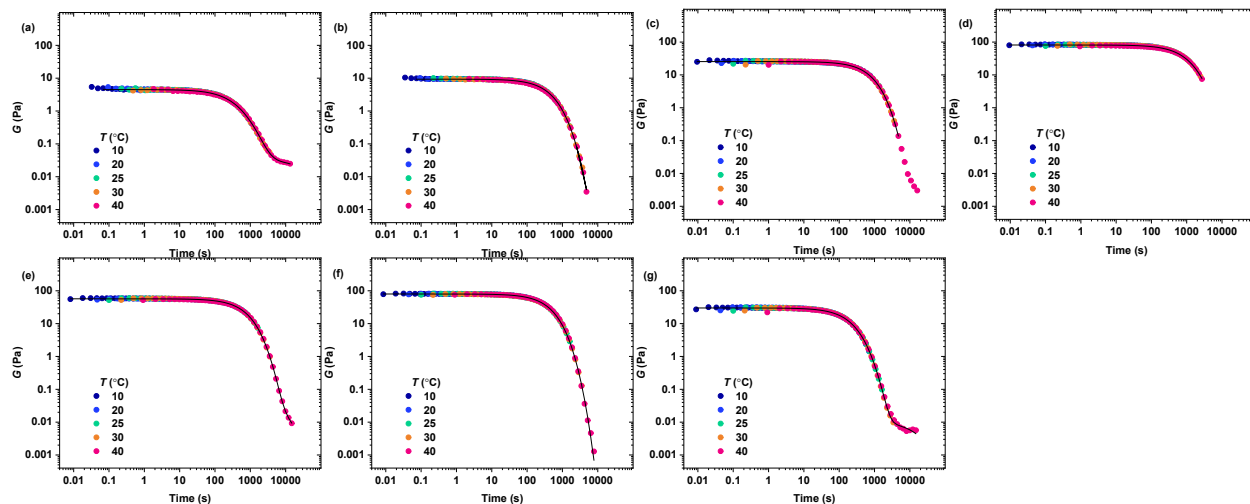

Figure S9. Shear modulus of mixed tetraPy/tetraEPhen networks (symbols) and the corresponding fit of the generalized Maxwell modes (curves) at Py:EPhen = 1:1, 25 °C, and varying EPhen:Fe<sup>2+</sup> ratios: (a) X = 8, (b) X = 7, (c) X = 6, (d) X = 5, (e) X = 4, (f) X = 3, (g) and X = 2.

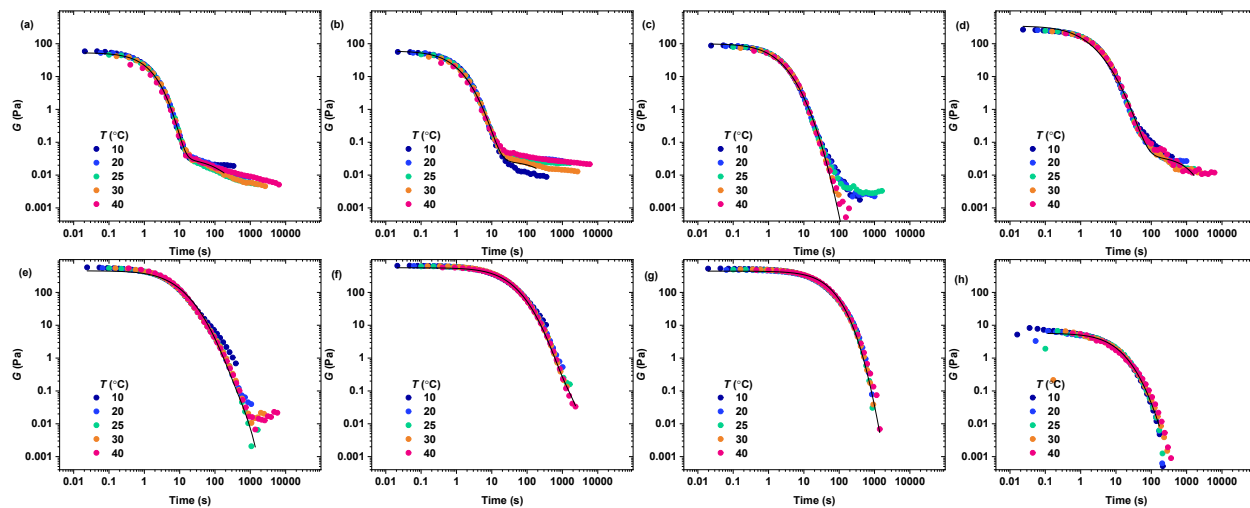

Figure S10. Shear modulus of mixed tetraPy/tetraEPhen networks (symbols) and the corresponding fit of the generalized Maxwell modes (curves) at Py:EPhen = 2:1, 25 °C, and varying EPhen:Pd<sup>2+</sup> ratios: (a) X = 8, (b) X = 7, (c) X = 6, (d) X = 5, (e) X = 4, (f) X = 3, (g) X = 2, and (h) X = 1.

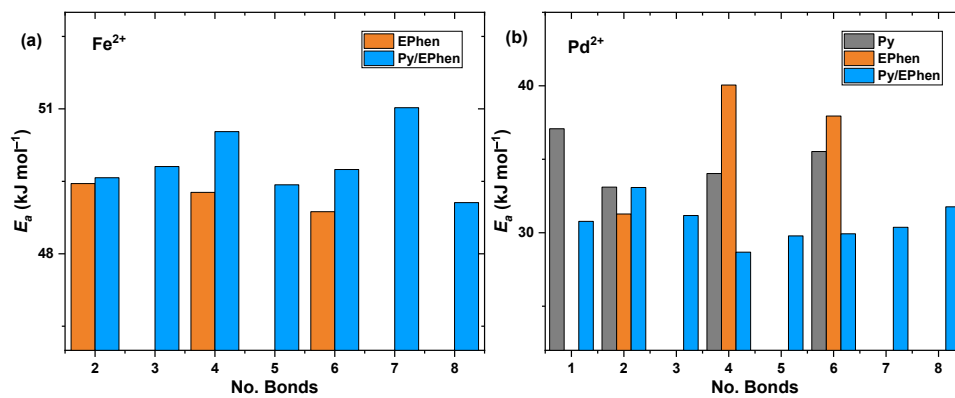

Figure S11. Activation energies obtained from time-temperature superposition of shear moduli of parent and mixed networks in the presence of (a)  $\text{Fe}^{2+}$  and (b)  $\text{Pd}^{2+}$ .

**Table S1. Complexation energies in kcal mol<sup>-1</sup> relative to the free metal ions (M<sup>2+</sup>).\***

|                                         | Fe    | Co    | Ni     | Cu    | Zn    | Pd     |
|-----------------------------------------|-------|-------|--------|-------|-------|--------|
| M(Py) <sub>1</sub>                      | 1.0   | -5.0  | -54.9  | -17.2 | -3.2  | -89.0  |
| M(Py) <sub>2</sub>                      | -29.2 | -7.9  | -74.5  | -27.5 | -7.6  | -114.1 |
| M(Py) <sub>3</sub>                      | -3.8  | -19.3 | -95.0  | -35.0 | -9.9  | -140.3 |
| M(Py) <sub>4</sub>                      | -10.5 | -19.5 | -108.1 | -41.8 | -12.1 | -161.7 |
| M(Py) <sub>6</sub>                      | -13.7 | -15.5 | -114.1 | -29.0 | 1.7   | -151.9 |
| M(EPhen) <sub>1</sub>                   | -12.4 | -20.2 | -85.5  | -21.2 | -11.1 | -128.1 |
| M(EPhen) <sub>2</sub>                   | -26.1 | -33.9 | -126.4 | -59.3 | -27.6 | -173.3 |
| M(EPhen) <sub>3</sub>                   | -46.2 | -55.0 | -154.6 | -61.2 | -32.5 | -167.0 |
| M(EPhen)(Py)                            | 3.3   | -26.2 | -105.2 | -45.0 | -18.1 | -148.4 |
| M(EPhen)(Py) <sub>2</sub>               | -17.7 | -35.1 | -120.6 | -51.1 | -18.9 | -172.6 |
| M(EPhen) <sub>2</sub> (Py) <sub>2</sub> | -30.0 | -43.2 | -142.6 | -52.0 | -22.4 | -160.0 |

$$* E_{Complexation} = E_{Complex} - (E_{Organics} + E_{M^{2+}})$$

**Table S2. Complexation energies in kcal mol<sup>-1</sup> of the metal ions (M<sup>2+</sup>) relative to the metal ions (M<sup>2+</sup>) included in the M(NO<sub>3</sub>)<sub>2</sub> salts.\***

|                                         | Fe    | Co    | Ni    | Cu    | Zn    | Pd    |
|-----------------------------------------|-------|-------|-------|-------|-------|-------|
| M(Py) <sub>1</sub>                      | 14.8  | 10.2  | 30.4  | 19.7  | 3.9   | 39.5  |
| M(Py) <sub>2</sub>                      | -15.5 | 7.3   | 10.8  | 9.3   | -0.5  | 14.4  |
| M(Py) <sub>3</sub>                      | 10.0  | -4.1  | -9.7  | 1.9   | -2.8  | -11.8 |
| M(Py) <sub>4</sub>                      | 3.3   | -4.2  | -22.8 | -4.9  | -5.0  | -33.2 |
| M(Py) <sub>6</sub>                      | 10.1  | -0.3  | -28.8 | 7.9   | 8.8   | -23.3 |
| M(EPhen) <sub>1</sub>                   | 1.4   | -4.9  | -0.2  | 15.7  | -4.0  | 0.4   |
| M(EPhen) <sub>2</sub>                   | -12.3 | -18.6 | -41.1 | -22.4 | -20.5 | -44.8 |
| M(EPhen) <sub>3</sub>                   | -32.5 | -39.8 | -69.3 | -24.3 | -25.4 | -38.5 |
| M(EPhen)(Py)                            | 17.1  | -11.0 | -19.9 | -8.1  | -11.0 | -19.9 |
| M(EPhen)(Py) <sub>2</sub>               | -3.9  | -19.9 | -35.3 | -14.3 | -11.8 | -44.1 |
| M(EPhen) <sub>2</sub> (Py) <sub>2</sub> | -16.2 | -28.0 | -57.3 | -15.2 | -15.3 | -31.5 |

$$* E_{Complexation} = E_{Complex} - (E_{Organics} + E_{InterSalt}), E_{InterSalt} = E_{Salt} - (E_{Counterion} + E_{M^{2+}})$$



**Table S3. Bond distances (in Å) of the metal ions with the atoms of the ligands (the second column corresponds to the ground state: S = singlet, D = doublet, T = triplet, Qua = quartet, Qui = quintet).**

|     |     |                                         |                    |       |       |       |       |       |
|-----|-----|-----------------------------------------|--------------------|-------|-------|-------|-------|-------|
| Fe  | Qui | M(Py) <sub>1</sub>                      | 1.901              |       |       |       |       |       |
|     | Qui | M(Py) <sub>2</sub>                      | 1.930              |       |       |       |       |       |
|     | Qui | M(Py) <sub>3</sub>                      | 1.987              |       |       |       |       |       |
|     | Qui | M(Py) <sub>4</sub>                      | 2.034              | 2.032 | 2.033 | 2.034 |       |       |
|     | Qui | M(Py) <sub>6</sub>                      | 2.289              | 2.211 | 2.211 | 2.206 |       |       |
|     | Qui | M(EPhen) <sub>1</sub>                   | 1.990              | 1.993 |       |       |       |       |
|     | Qui | M(EPhen) <sub>2</sub>                   | 2.021              | 2.035 | 2.022 | 2.034 |       |       |
|     | S   | M(EPhen) <sub>3</sub>                   | 1.955              | 1.950 | 1.955 | 1.948 | 1.956 | 1.950 |
|     | Qui | M(EPhen)(Py)                            | 2.022              | 2.029 | 1.967 |       |       |       |
|     | Qui | M(EPhen)(Py) <sub>2</sub>               | 2.055              | 2.056 | 2.010 | 2.010 |       |       |
|     | S   | M(EPhen) <sub>2</sub> (Py) <sub>2</sub> | 1.967              | 1.949 | 1.967 | 1.949 | 2.009 | 2.009 |
|     | Co  | Qua                                     | M(Py) <sub>1</sub> | 1.860 |       |       |       |       |
| Qua |     | M(Py) <sub>2</sub>                      | 1.894              |       |       |       |       |       |
| Qua |     | M(Py) <sub>3</sub>                      | 1.945              |       |       |       |       |       |
| Qua |     | M(Py) <sub>4</sub>                      | 2.068              |       |       |       |       |       |
| Qua |     | M(Py) <sub>6</sub>                      | 2.259              | 2.177 | 2.263 | 2.178 |       |       |
| Qua |     | M(EPhen) <sub>1</sub>                   | 1.936              | 1.970 |       |       |       |       |
| D   |     | M(EPhen) <sub>2</sub>                   | 1.936              | 1.904 | 1.905 | 1.936 |       |       |
| D   |     | M(EPhen) <sub>3</sub>                   | 1.953              | 2.151 | 1.950 | 1.943 | 1.952 | 2.150 |
| Qui |     | M(EPhen)(Py)                            | 2.022              | 1.978 | 1.929 |       |       |       |
| D   |     | M(EPhen)(Py) <sub>2</sub>               | 1.939              | 1.940 | 1.915 | 1.916 |       |       |
| D   |     | M(EPhen) <sub>2</sub> (Py) <sub>2</sub> | 1.953              | 2.173 | 1.958 | 1.951 | 1.969 | 2.346 |
| Ni  | T   | M(Py) <sub>1</sub>                      | 1.856              |       |       |       |       |       |

|    |    |                                         |                    |       |       |       |       |       |
|----|----|-----------------------------------------|--------------------|-------|-------|-------|-------|-------|
|    | T  | M(Py) <sub>2</sub>                      | 1.866              |       |       |       |       |       |
|    | T  | M(Py) <sub>3</sub>                      | 1.919              |       |       |       |       |       |
|    | T  | M(Py) <sub>4</sub>                      | 1.903              | 1.903 | 1.903 | 1.903 |       |       |
|    | T  | M(Py) <sub>6</sub>                      | 2.269              | 2.273 | 2.158 | 2.158 |       |       |
|    | T  | M(EPhen) <sub>1</sub>                   | 1.910              | 1.914 |       |       |       |       |
|    | T  | M(EPhen) <sub>2</sub>                   | 1.996              | 1.983 | 1.982 | 2.004 |       |       |
|    | T  | M(EPhen) <sub>3</sub>                   | 2.080              | 2.076 | 2.081 | 2.075 | 2.081 | 2.075 |
|    | T  | M(EPhen)(Py)                            | 1.981              | 1.945 | 1.911 |       |       |       |
|    | S  | M(EPhen)(Py) <sub>2</sub>               | 1.914              | 1.911 | 1.890 | 1.889 |       |       |
|    | T  | M(EPhen) <sub>2</sub> (Py) <sub>2</sub> | 2.096              | 2.094 | 2.096 | 2.094 | 2.101 | 2.106 |
| Cu | D  | M(Py) <sub>1</sub>                      | 1.911              |       |       |       |       |       |
|    | D  | M(Py) <sub>2</sub>                      | 1.886              |       |       |       |       |       |
|    | D  | M(Py) <sub>3</sub>                      | 1.942              | 1.931 | 1.930 |       |       |       |
|    | D  | M(Py) <sub>4</sub>                      | 2.026              |       |       |       |       |       |
|    | D  | M(Py) <sub>6</sub>                      | 2.079              | 2.078 | 2.073 | 2.073 |       |       |
|    | D  | M(EPhen) <sub>1</sub>                   | 1.991              | 1.991 |       |       |       |       |
|    | D  | M(EPhen) <sub>2</sub>                   | 2.030              | 2.031 | 2.030 | 2.031 |       |       |
|    | D  | M(EPhen) <sub>3</sub>                   | 2.332              | 2.051 | 2.327 | 2.048 | 2.064 | 2.058 |
|    | D  | M(EPhen)(Py)                            | 2.042              | 2.016 | 1.921 |       |       |       |
|    | D  | M(EPhen)(Py) <sub>2</sub>               | 2.050              | 2.048 | 2.012 | 2.012 |       |       |
|    | D  | M(EPhen) <sub>2</sub> (Py) <sub>2</sub> | 2.071              | 2.361 | 2.077 | 2.063 | 2.038 | 2.391 |
|    | Zn | S                                       | M(Py) <sub>1</sub> | 1.947 |       |       |       |       |
| S  |    | M(Py) <sub>2</sub>                      | 1.885              |       |       |       |       |       |
| S  |    | M(Py) <sub>3</sub>                      | 1.962              |       |       |       |       |       |
| S  |    | M(Py) <sub>4</sub>                      | 2.022              | 2.020 | 2.021 | 2.021 |       |       |

|    |   |                                         |       |       |       |       |       |       |
|----|---|-----------------------------------------|-------|-------|-------|-------|-------|-------|
|    | S | M(Py) <sub>6</sub>                      | 2.204 | 2.201 | 2.207 | 2.204 |       |       |
|    | S | M(EPhen) <sub>1</sub>                   | 2.004 | 2.005 |       |       |       |       |
|    | S | M(EPhen) <sub>2</sub>                   | 2.031 | 2.027 | 2.031 | 2.027 |       |       |
|    | S | M(EPhen) <sub>3</sub>                   | 2.175 | 2.165 | 2.171 | 2.161 | 2.176 | 2.165 |
|    | S | M(EPhen)(Py)                            | 1.998 | 1.993 | 1.929 |       |       |       |
|    | S | M(EPhen)(Py) <sub>2</sub>               | 2.053 | 2.049 | 2.001 | 2.001 |       |       |
|    | S | M(EPhen) <sub>2</sub> (Py) <sub>2</sub> | 2.184 | 2.206 | 2.183 | 2.206 | 2.152 | 2.157 |
| Pd | S | M(Py) <sub>1</sub>                      | 1.980 |       |       |       |       |       |
|    | S | M(Py) <sub>2</sub>                      | 2.022 |       |       |       |       |       |
|    | S | M(Py) <sub>3</sub>                      | 1.997 | 2.027 | 2.028 |       |       |       |
|    | S | M(Py) <sub>4</sub>                      | 2.047 |       |       |       |       |       |
|    | S | M(Py) <sub>6</sub>                      | 2.058 | 2.044 | 2.056 | 2.045 |       |       |
|    | S | M(EPhen) <sub>1</sub>                   | 2.110 | 2.110 |       |       |       |       |
|    | S | M(EPhen) <sub>2</sub>                   | 2.057 | 2.057 | 2.057 | 2.057 |       |       |
|    | S | M(EPhen) <sub>3</sub>                   | 2.072 | 2.730 | 2.045 | 2.041 | 2.744 | 2.072 |
|    | S | M(EPhen)(Py)                            | 1.998 | 1.993 | 1.929 |       |       |       |
|    | S | M(EPhen)(Py) <sub>2</sub>               | 2.043 | 2.039 | 2.043 | 2.042 |       |       |
|    | S | M(EPhen) <sub>2</sub> (Py) <sub>2</sub> | 2.055 | 2.808 | 2.058 | 2.767 | 2.043 | 2.061 |

**Table S4. Mayer Bond Orders of the metal ions with the atoms of the ligands.**

|    |                                         |       |       |       |       |       |       |
|----|-----------------------------------------|-------|-------|-------|-------|-------|-------|
| Fe | M(Py) <sub>1</sub>                      | 0.759 |       |       |       |       |       |
|    | M(Py) <sub>2</sub>                      | 0.654 | 0.654 |       |       |       |       |
|    | M(Py) <sub>3</sub>                      | 0.586 | 0.586 | 0.586 |       |       |       |
|    | M(Py) <sub>4</sub>                      | 0.511 | 0.511 | 0.512 | 0.511 |       |       |
|    | M(Py) <sub>6</sub>                      | 0.363 | 0.371 | 0.372 | 0.342 | 0.336 | 0.363 |
|    | M(EPhen) <sub>1</sub>                   | 0.575 | 0.567 |       |       |       |       |
|    | M(EPhen) <sub>2</sub>                   | 0.529 | 0.517 | 0.530 | 0.516 |       |       |
|    | M(EPhen) <sub>3</sub>                   | 0.675 | 0.679 | 0.673 | 0.679 | 0.676 | 0.682 |
|    | M(EPhen)(Py)                            | 0.535 | 0.526 | 0.609 |       |       |       |
|    | M(EPhen)(Py) <sub>2</sub>               | 0.493 | 0.491 | 0.540 | 0.539 |       |       |
|    | M(EPhen) <sub>2</sub> (Py) <sub>2</sub> | 0.677 | 0.695 | 0.677 | 0.695 | 0.606 | 0.606 |
| Co | M(Py) <sub>1</sub>                      | 0.775 |       |       |       |       |       |
|    | M(Py) <sub>2</sub>                      | 0.675 | 0.675 |       |       |       |       |
|    | M(Py) <sub>3</sub>                      | 0.600 | 0.600 | 0.600 |       |       |       |
|    | M(Py) <sub>4</sub>                      | 0.467 |       |       |       |       |       |
|    | M(Py) <sub>6</sub>                      | 0.375 | 0.377 | 0.377 | 0.353 | 0.348 | 0.375 |
|    | M(EPhen) <sub>1</sub>                   | 0.603 | 0.563 |       |       |       |       |
|    | M(EPhen) <sub>2</sub>                   | 0.640 | 0.646 | 0.648 | 0.642 |       |       |
|    | M(EPhen) <sub>3</sub>                   | 0.617 | 0.389 | 0.618 | 0.390 | 0.629 | 0.637 |
|    | M(EPhen)(Py)                            | 0.503 | 0.548 | 0.617 |       |       |       |
|    | M(EPhen)(Py) <sub>2</sub>               | 0.626 | 0.625 | 0.628 | 0.629 |       |       |
|    | M(EPhen) <sub>2</sub> (Py) <sub>2</sub> | 0.618 | 0.378 | 0.624 | 0.636 | 0.591 | 0.288 |
| Ni | M(Py) <sub>1</sub>                      | 0.733 |       |       |       |       |       |
|    | M(Py) <sub>2</sub>                      | 0.681 | 0.681 |       |       |       |       |

|                                         |                                         |       |       |       |       |       |       |
|-----------------------------------------|-----------------------------------------|-------|-------|-------|-------|-------|-------|
|                                         | M(Py) <sub>3</sub>                      | 0.610 | 0.610 | 0.610 |       |       |       |
|                                         | M(Py) <sub>4</sub>                      | 0.619 | 0.619 | 0.619 | 0.619 |       |       |
|                                         | M(Py) <sub>6</sub>                      | 0.382 | 0.384 | 0.384 | 0.351 | 0.349 | 0.382 |
|                                         | M(EPhen) <sub>1</sub>                   | 0.590 | 0.581 |       |       |       |       |
|                                         | M(EPhen) <sub>2</sub>                   | 0.515 | 0.498 | 0.517 | 0.520 |       |       |
|                                         | M(EPhen) <sub>3</sub>                   | 0.424 | 0.427 | 0.424 | 0.427 | 0.424 | 0.428 |
|                                         | M(EPhen)(Py)                            | 0.503 | 0.545 | 0.604 |       |       |       |
|                                         | M(EPhen)(Py) <sub>2</sub>               | 0.627 | 0.630 | 0.626 | 0.628 |       |       |
|                                         | M(EPhen) <sub>2</sub> (Py) <sub>2</sub> | 0.418 | 0.417 | 0.418 | 0.417 | 0.411 | 0.412 |
| Cu                                      | M(Py) <sub>1</sub>                      | 0.668 |       |       |       |       |       |
|                                         | M(Py) <sub>2</sub>                      | 0.645 | 0.645 |       |       |       |       |
|                                         | M(Py) <sub>3</sub>                      | 0.613 | 0.542 | 0.614 |       |       |       |
|                                         | M(Py) <sub>4</sub>                      | 0.494 |       |       |       |       |       |
|                                         | M(Py) <sub>6</sub>                      | 0.203 | 0.201 | 0.450 | 0.440 | 0.438 | 0.449 |
|                                         | M(EPhen) <sub>1</sub>                   | 0.514 | 0.510 |       |       |       |       |
|                                         | M(EPhen) <sub>2</sub>                   | 0.478 | 0.474 | 0.479 | 0.474 |       |       |
|                                         | M(EPhen) <sub>3</sub>                   | 0.267 | 0.456 | 0.444 | 0.448 | 0.273 | 0.457 |
|                                         | M(EPhen)(Py)                            | 0.453 | 0.475 | 0.630 |       |       |       |
|                                         | M(EPhen)(Py) <sub>2</sub>               | 0.467 | 0.465 | 0.495 | 0.494 |       |       |
| M(EPhen) <sub>2</sub> (Py) <sub>2</sub> | 0.444                                   | 0.251 | 0.439 | 0.451 | 0.469 | 0.254 |       |
| Zn                                      | M(Py) <sub>1</sub>                      | 0.833 |       |       |       |       |       |
|                                         | M(Py) <sub>2</sub>                      | 0.792 | 0.792 |       |       |       |       |
|                                         | M(Py) <sub>3</sub>                      | 0.640 | 0.640 | 0.640 |       |       |       |
|                                         | M(Py) <sub>4</sub>                      | 0.526 | 0.526 | 0.526 | 0.526 |       |       |
|                                         | M(Py) <sub>6</sub>                      | 0.351 | 0.353 | 0.353 | 0.320 | 0.313 | 0.351 |

|    |                                         |       |       |       |       |       |       |
|----|-----------------------------------------|-------|-------|-------|-------|-------|-------|
|    | M(EPhen) <sub>1</sub>                   | 0.599 | 0.591 |       |       |       |       |
|    | M(EPhen) <sub>2</sub>                   | 0.527 | 0.532 | 0.527 | 0.532 |       |       |
|    | M(EPhen) <sub>3</sub>                   | 0.362 | 0.368 | 0.361 | 0.368 | 0.364 | 0.370 |
|    | M(EPhen)(Py)                            | 0.594 | 0.601 | 0.702 |       |       |       |
|    | M(EPhen)(Py) <sub>2</sub>               | 0.496 | 0.500 | 0.559 | 0.558 |       |       |
|    | M(EPhen) <sub>2</sub> (Py) <sub>2</sub> | 0.358 | 0.341 | 0.359 | 0.340 | 0.383 | 0.384 |
| Pd | M(Py) <sub>1</sub>                      | 0.781 |       |       |       |       |       |
|    | M(Py) <sub>2</sub>                      | 0.675 | 0.675 |       |       |       |       |
|    | M(Py) <sub>3</sub>                      | 0.618 | 0.725 | 0.621 |       |       |       |
|    | M(Py) <sub>4</sub>                      | 0.581 |       |       |       |       |       |
|    | M(Py) <sub>6</sub>                      | 0.561 | 0.564 | 0.066 | 0.554 | 0.590 | 0.054 |
|    | M(EPhen) <sub>1</sub>                   | 0.461 | 0.457 |       |       |       |       |
|    | M(EPhen) <sub>2</sub>                   | 0.590 | 0.593 | 0.590 | 0.593 |       |       |
|    | M(EPhen) <sub>3</sub>                   | 0.569 | 0.571 | 0.133 | 0.547 | 0.547 | 0.135 |
|    | M(EPhen)(Py)                            | 0.640 | 0.580 | 0.610 |       |       |       |
|    | M(EPhen)(Py) <sub>2</sub>               | 0.596 | 0.600 | 0.576 | 0.579 |       |       |
|    | M(EPhen) <sub>2</sub> (Py) <sub>2</sub> | 0.553 | 0.100 | 0.552 | 0.111 | 0.573 | 0.539 |

**Table S5. HOMO-LUMO gap (in a.u.).**

|                                         | Fe    | Co    | Ni    | Cu    | Zn    | Pd    |
|-----------------------------------------|-------|-------|-------|-------|-------|-------|
| M(Py) <sub>1</sub>                      | 0.051 | 0.066 | 0.058 | 0.072 | 0.012 | 0.003 |
| M(Py) <sub>2</sub>                      | 0.086 | 0.086 | 0.081 | 0.080 | 0.125 | 0.002 |
| M(Py) <sub>3</sub>                      | 0.089 | 0.095 | 0.092 | 0.077 | 0.144 | 0.044 |
| M(Py) <sub>4</sub>                      | 0.069 | 0.066 | 0.088 | 0.092 | 0.152 | 0.113 |
| M(Py) <sub>6</sub>                      | 0.052 | 0.062 | 0.095 | 0.078 | 0.147 | 0.098 |
| M(EPhen) <sub>1</sub>                   | 0.032 | 0.035 | 0.036 | 0.037 | 0.005 | 0.034 |
| M(EPhen) <sub>2</sub>                   | 0.028 | 0.014 | 0.028 | 0.032 | 0.049 | 0.017 |
| M(EPhen) <sub>3</sub>                   | 0.028 | 0.040 | 0.057 | 0.030 | 0.028 | 0.045 |
| M(EPhen)(Py)                            | 0.030 | 0.031 | 0.035 | 0.037 | 0.041 | 0.005 |
| M(EPhen)(Py) <sub>2</sub>               | 0.033 | 0.025 | 0.036 | 0.033 | 0.050 | 0.025 |
| M(EPhen) <sub>2</sub> (Py) <sub>2</sub> | 0.028 | 0.045 | 0.056 | 0.029 | 0.057 | 0.053 |

**Table S6. NPA charges on the metal ion of the complexes.**

|                                         | Fe     | Co    | Ni     | Cu     | Zn    | Pd     |
|-----------------------------------------|--------|-------|--------|--------|-------|--------|
| M(Py) <sub>1</sub>                      | 2.449  | 1.863 | 1.287  | 0.618  | 1.349 | 0.917  |
| M(Py) <sub>2</sub>                      | 2.461  | 1.855 | 1.252  | 0.523  | 1.365 | 0.764  |
| M(Py) <sub>3</sub>                      | 2.371  | 1.820 | 1.228  | 0.688  | 1.265 | 0.727  |
| M(Py) <sub>4</sub>                      | 2.321  | 1.865 | 0.667  | 0.690  | 1.163 | 0.587  |
| M(Py) <sub>6</sub>                      | 2.426  | 1.851 | 1.283  | 0.736  | 1.245 | 0.560  |
| M(EPhen) <sub>1</sub>                   | 2.300  | 1.684 | 1.074  | 0.515  | 1.208 | 0.692  |
| M(EPhen) <sub>2</sub>                   | -0.313 | 0.164 | -0.141 | -0.324 | 0.152 | -0.287 |
| M(EPhen) <sub>3</sub>                   | 2.272  | 0.877 | 1.068  | 0.548  | 1.162 | 0.630  |
| M(EPhen)(Py)                            | 2.347  | 1.722 | 1.093  | 0.519  | 1.273 | 0.689  |
| M(EPhen)(Py) <sub>2</sub>               | 2.322  | 0.920 | 0.676  | 0.635  | 1.163 | 0.598  |
| M(EPhen) <sub>2</sub> (Py) <sub>2</sub> | 0.380  | 0.781 | 1.185  | 0.695  | 1.178 | 0.583  |



**Table S7. XYZ coordinates and absolute energies (in a.u.) of all computed species by DFT (T = triplet, Q = quartet or quintet, and without a final letter means singlet or doublet for even and odd electron metals)**

**(attached as a separate file, labelled Scoordinates.xyz)**
